# Supplementary material for: In silico Analysis of Sequential, Structural and Functional Diversity of Wheat Cystatins and Its Implication in Plant Defense
Source: PubMed Central journal article supplement — Genomics Proteomics Bioinformatics. 2010 May 5;8(1):42–56. doi: 10.1016/S1672-0229(10)60005-8 (PMC5054136; doi:10.1016/s1672-0229(10)60005-8), 2010-05-05
Supplement: mmc1.pdf [file mmc1.pdf]

## Supplementary Material

Dutt, S., *et al.* 2010. *In silico* analysis of sequential, structural and functional diversity of wheat cystatins and its implication in plant defense. *Genomics Proteomics Bioinformatics* 8: 42-56.

DOI: 10.1016/S1672-0229(10)60005-8

Tables S1-S5

**Table S1** TargetP prediction results of cystatins

| Cystatin         | Length | cTP   | mTP   | SP    | other | Loc | RC | CS |
|------------------|--------|-------|-------|-------|-------|-----|----|----|
| WC1AB038392      | 142    | 0.000 | 0.356 | 0.960 | 0.039 | S   | 2  | 28 |
| WC2AB038395      | 78     | 0.037 | 0.415 | 0.179 | 0.605 | O   | 5  | -  |
| WC3AB038394      | 125    | 0.089 | 0.485 | 0.036 | 0.475 | M   | 5  | -  |
| WC4AB038393      | 142    | 0.002 | 0.559 | 0.925 | 0.008 | S   | 4  | 27 |
| WC5AF364099      | 128    | 0.010 | 0.041 | 0.983 | 0.033 | S   | 1  | 22 |
| WCMDAB223039     | 243    | 0.014 | 0.175 | 0.897 | 0.008 | S   | 2  | 37 |
| OCIOs01g58890    | 140    | 0.002 | 0.603 | 0.894 | 0.006 | S   | 4  | 26 |
| OCHIOs05g41460   | 151    | 0.793 | 0.338 | 0.083 | 0.009 | C   | 3  | 15 |
| OCHIOs05g33880   | 184    | 0.006 | 0.652 | 0.649 | 0.004 | M   | 5  | 35 |
| OCIVOs01g68660   | 158    | 0.005 | 0.115 | 0.957 | 0.005 | S   | 1  | 24 |
| OCVOs01g68670    | 148    | 0.001 | 0.221 | 0.994 | 0.006 | S   | 2  | 25 |
| OCVIOs03g11180   | 113    | 0.077 | 0.353 | 0.385 | 0.029 | S   | 5  | 18 |
| OCVIOs03g11170   | 117    | 0.005 | 0.048 | 0.990 | 0.030 | S   | 1  | 24 |
| OCVIII0s03g31510 | 123    | 0.010 | 0.171 | 0.862 | 0.019 | S   | 2  | 19 |
| OCIXOs03g11160   | 114    | 0.004 | 0.048 | 0.986 | 0.110 | S   | 1  | 23 |
| OCXOs04g28250    | 151    | 0.033 | 0.003 | 0.983 | 0.032 | S   | 1  | 22 |
| OCXIOs09g08100   | 120    | 0.008 | 0.064 | 0.951 | 0.016 | S   | 1  | 24 |
| OCXIOs01g16430   | 250    | 0.020 | 0.534 | 0.692 | 0.024 | S   | 5  | 32 |
| icy1AJ536590     | 107    | 0.076 | 0.591 | 0.043 | 0.497 | M   | 5  | -  |
| icy2AJ748337     | 140    | 0.000 | 0.693 | 0.937 | 0.012 | S   | 4  | 26 |
| icy3AJ748338     | 179    | 0.006 | 0.198 | 0.928 | 0.004 | S   | 2  | 30 |
| icy4AJ748344     | 243    | 0.009 | 0.190 | 0.898 | 0.007 | S   | 2  | 32 |
| icy5AJ748340     | 151    | 0.002 | 0.149 | 0.980 | 0.012 | S   | 1  | 25 |
| icy6AJ748341     | 124    | 0.001 | 0.347 | 0.938 | 0.015 | S   | 3  | 22 |
| icy7AJ748345     | 124    | 0.027 | 0.149 | 0.620 | 0.186 | S   | 3  | 16 |
| cc1AM05530       | 135    | 0.003 | 0.248 | 0.974 | 0.003 | S   | 2  | 27 |
| cc2AM05531       | 134    | 0.006 | 0.130 | 0.982 | 0.007 | S   | 1  | 27 |
| cc3AM05532       | 97     | 0.210 | 0.119 | 0.064 | 0.815 | O   | 2  | -  |
| cc4AM05533       | 226    | 0.012 | 0.025 | 0.988 | 0.012 | S   | 1  | 26 |
| cc5AM05534       | 68     | 0.044 | 0.394 | 0.107 | 0.431 | O   | 5  | -  |
| cc6AM05535       | 116    | 0.015 | 0.368 | 0.854 | 0.004 | S   | 3  | 22 |
| cc7AM05536       | 97     | 0.372 | 0.107 | 0.029 | 0.840 | O   | 3  | -  |
| cc8AM05537       | 127    | 0.043 | 0.017 | 0.948 | 0.065 | S   | 1  | 29 |
| cc9AM05538       | 78     | 0.821 | 0.321 | 0.052 | 0.010 | C   | 3  | 30 |
| cc10AM05539      | 120    | 0.136 | 0.225 | 0.043 | 0.811 | O   | 3  | -  |
| SB1X87168        | 130    | 0.041 | 0.267 | 0.790 | 0.007 | S   | 3  | 20 |

Note: cTP, chloroplast transit peptide; mTP, mitochondrial transit peptide; SP, signal peptide; Location: S, secretory; M, mitochondrial; O, any other location; RC, reliability class from 1 to 5, where 1 indicates the strongest prediction; CS, cleavage site as predicted by SignalP.

**Table S2** Conserved motifs as determined by MEME program in wheat, rice and barley cystatins

| Motif | Width (residues) | Best possible match                                |
|-------|------------------|----------------------------------------------------|
| 1     | 15               | LYEAKVWEK <b>P</b> WENFK                           |
| 2     | 11               | <b>Q</b> VVAGTLYYLT                                |
| 3     | 15               | HVQEL <b>A</b> R <b>F</b> A <b>V</b> AEHNK         |
| 4     | 15               | ANALLEFERVVKAKQ                                    |
| 5     | 15               | PLVGGWSDIPDVEDN                                    |
| 6     | 8                | ELQEFKPA                                           |
| 7     | 15               | KSIQERSNSLFPYEL                                    |
| 8     | 15               | GGHEPGWRDVPVHDP                                    |
| 9     | 15               | EDFAKFDILMCLKRG                                    |
| 10    | 15               | FTQTQMQSARDKAAM                                    |
| 11    | 14               | MRKHRVVGLVAALL                                     |
| 12    | 15               | KEEK <b>M</b> KA <b>E</b> VHKN <b>L</b> E <b>G</b> |
| 13    | 14               | GDATSFTIADLGAK                                     |
| 14    | 8                | VKEGGAKK                                           |
| 15    | 11               | LFLVGSASLAI                                        |

Note: Bold letters represent the signature sequences of cystatins.

**Table S3** Different motifs and their functions in the promoter sequences of OCI, OCII, OCXII and icy1

| No. | Motifs found    | Sequence   | Function                                                             | OCI | OCII | OCXII | icy1 |
|-----|-----------------|------------|----------------------------------------------------------------------|-----|------|-------|------|
| 1   | ABRE            | GCCGCGTGGC | cis-acting element involved in abscisic acid responsiveness          | +   | +    | +     | -    |
| 2   | Box W1          | TTGACC     | fungal elicitor responsive element                                   | -   | -    | +     | -    |
| 3   | CAAT-box        | CAAT       | common cis-acting element in promoter and enhancer regions           | +   | +    | +     | +    |
| 4   | CAT-box         | GCCACT     | cis-acting regulatory element related to meristem expression         | -   | -    | +     | -    |
| 5   | CGTCA motif     | CGTCA      | cis-acting regulatory element involved in MeJA responsiveness        | +   | +    | +     | -    |
| 6   | G-box           | GACATGTGGT | cis-acting regulatory element involved in light responsiveness       | +   | +    | -     | +    |
| 7   | GC-motif        | CCCCCG     | enhancer-like element involved in anoxic specific inducibility       | +   | -    | -     | +    |
| 8   | GCN4 motif      | CAAGCCA    | cis-acting regulatory element involved in endosperm expression       | -   | -    | -     | +    |
| 9   | GT1 motif       | GGTTAA     | light responsive element                                             | +   | +    | -     | -    |
| 10  | LTR             | CCGAAA     | cis-acting element involved in low-temperature responsiveness        | +   | -    | -     | +    |
| 11  | MBS             | CAACTG     | MYB binding site involved in drought inducibility                    | +   | +    | -     | -    |
| 12  | Motif II b      | CCGCCGCGCT | abscisic acid responsive element                                     | +   | -    | -     | -    |
| 13  | O2-             | GTTGACGTGA | cis-acting regulatory element involved in zein metabolism regulation | +   | -    | +     | -    |
| 14  | Skn-1 motif     | GTCAT      | cis-acting regulatory element required for endosperm expression      | +   | +    | +     | +    |
| 15  | Sp1             | CC(G/A)CCC | light responsive element                                             | +   | +    | +     | +    |
| 16  | TATA            | TATA       | core promoter element around -30 of transcription start              | +   | +    | +     | +    |
| 17  | TCA             | GAGAAGAATA | cis-acting element involved in salicylic acid responsiveness         | -   | -    | +     | -    |
| 18  | TC-rich repeats | ATTCTCTAAC | cis-acting element involved in defense and stress responsiveness     | -   | -    | -     | +    |
| 19  | TGACG           | TGACG      | cis-acting regulatory element involved in MeJA responsiveness        | +   | +    | -     | +    |
| 20  | TGA element     | AACGAC     | auxin responsive element                                             | -   | +    | -     | -    |

Note: The promoter sequences cover 1,000 bases upstream of the start site. +/- represents presence or absence of a particular motif in a promoter. Motifs identified only on the positive strand are considered.

**Table S4** Protein–protein interactions of <math><4\text{\AA}</math> in complexes of WC1 and WC5 with papain compared with steffin–papain complex

| Papain residues                                         | N-terminal residues |      |      |     |     |     |      |     |     |     |     |     |      |      |     |     |     |
|---------------------------------------------------------|---------------------|------|------|-----|-----|-----|------|-----|-----|-----|-----|-----|------|------|-----|-----|-----|
|                                                         | Stefin B            |      |      | WC1 |     |     |      |     |     |     | WC5 |     |      |      |     |     |     |
|                                                         | M6                  | M7   | S8   | G9  | A10 | P11 | V47  | G48 | G49 | I50 | E39 | N40 | G41  |      |     |     |     |
| Y61                                                     |                     | +    |      |     |     |     |      |     |     |     |     |     |      |      |     |     |     |
| N64                                                     |                     |      |      | +   | +   | +   |      |     |     |     |     |     |      |      |     |     |     |
| G65                                                     |                     |      | +    | +   |     |     |      |     |     |     |     |     |      |      |     |     |     |
| G66                                                     |                     | +    | +    |     |     |     |      |     |     |     |     |     |      |      |     |     |     |
| Y67                                                     |                     | +    |      |     |     |     |      |     |     |     |     |     |      |      |     |     |     |
| P68                                                     | +                   |      |      |     |     |     |      |     |     |     |     |     |      |      |     |     |     |
| W69                                                     | +                   |      |      |     |     |     |      |     |     |     |     |     |      |      |     |     |     |
| V133                                                    |                     |      | +    |     |     |     |      |     |     |     |     |     |      |      |     |     |     |
| Q135                                                    |                     |      |      |     |     |     |      |     |     |     |     |     | +    |      |     |     |     |
| A137                                                    |                     |      |      |     |     |     | +    |     |     |     |     |     |      |      | +   |     |     |
| K156                                                    |                     |      |      |     |     |     |      | +   |     |     |     |     |      |      | +   |     |     |
| V157                                                    |                     |      |      |     |     |     |      | +   | +   |     |     |     | +    | +    |     |     |     |
| D158                                                    |                     |      | +    | +   |     |     |      | +   | +   |     |     |     | +    | +    | +   |     |     |
| H159                                                    |                     |      |      |     |     |     |      |     | +   |     |     |     |      |      |     |     |     |
| A160                                                    |                     |      | +    |     |     |     |      |     |     |     |     |     |      |      |     |     |     |
| C200                                                    |                     |      |      |     |     |     |      |     |     |     |     |     | +    |      |     |     |     |
| First hairpin loop and adjacent residues making contact |                     |      |      |     |     |     |      |     |     |     |     |     |      |      |     |     |     |
|                                                         | Q53                 | V54  | V55  | A56 | N59 |     | Q93  | T94 | V95 | A96 | G97 | M99 | K101 | L84  | V85 | S86 | G87 |
| N18                                                     |                     |      |      | +   |     |     |      |     |     | +   |     |     |      |      |     |     | +   |
| Q19                                                     |                     |      |      | +   |     |     |      |     | +   | +   |     |     |      |      | +   | +   |     |
| G20                                                     |                     |      |      | +   | +   |     |      |     | +   | +   | +   |     |      |      | +   | +   | +   |
| S21                                                     |                     |      |      | +   |     |     |      |     | +   |     |     | +   |      |      | +   | +   |     |
| C22                                                     |                     |      |      | +   |     |     | +    |     | +   |     |     |     |      |      | +   | +   |     |
| G23                                                     |                     |      |      | +   |     |     |      |     |     |     |     |     |      |      |     |     |     |
| C63                                                     | +                   |      |      |     |     |     |      |     |     |     |     |     | +    |      |     |     |     |
| N64                                                     |                     |      |      |     |     |     |      |     |     |     |     |     | +    |      |     |     |     |
| Q94                                                     |                     |      |      |     |     |     |      | +   |     |     |     |     |      |      |     |     |     |
| A136                                                    |                     | +    |      |     |     |     |      |     |     |     |     |     |      |      |     |     |     |
| A137                                                    |                     | +    |      |     |     |     |      |     |     |     |     |     |      |      |     |     |     |
| D158                                                    |                     | +    |      |     |     |     |      |     |     |     |     |     |      | +    |     |     |     |
| S176                                                    |                     |      |      |     |     |     |      |     | +   | +   |     |     |      |      |     |     |     |
| W177                                                    |                     |      |      | +   | +   |     |      |     | +   | +   |     |     |      |      | +   |     |     |
| Second hairpin residues                                 |                     |      |      |     |     |     |      |     |     |     |     |     |      |      |     |     |     |
|                                                         | L102                | P103 | H104 |     |     |     | P123 |     |     |     |     |     |      | W115 |     |     |     |
| G108                                                    |                     |      | +    |     |     |     |      |     |     |     |     |     |      |      |     |     |     |
| Q142                                                    |                     |      |      |     |     |     | +    |     |     |     |     |     |      | +    |     |     |     |
| L143                                                    |                     | +    |      |     |     |     |      |     |     |     |     |     |      |      |     |     |     |
| W177                                                    | +                   |      |      |     |     |     |      |     |     |     |     |     |      |      |     |     |     |

Note: Only those N-terminal residues of WC1 and WC5 have been listed, which form interactions with the active site cleft of papain. “+” indicates the presence of interaction of less than 4Å between two residues.

**Table S5** Values of  $\Phi$ ,  $\psi$  and  $\omega$  of amino acid residues of stefin B, WC1 and WC5 listed in Table S4

| Cystatin | Residue | phi    | psi    | omega  |
|----------|---------|--------|--------|--------|
| Stefin B | Met7    | -62.0  | 98.5   | 167.7  |
|          | Ser8    | -97.5  | 135.6  | -171.4 |
|          | Gly9    | 96.7   | 10.5   | 168.2  |
|          | Ala10   | -88.6  | 145.8  | 176.3  |
|          | Pro11   | -56.4  | 156.5  | 173.1  |
|          | Gln53   | -142.6 | 141.0  | 158.5  |
|          | Val54   | -87.3  | 112.1  | -179.9 |
|          | Val55   | -118.7 | -148.6 | 176.8  |
|          | Ala56   | -80.9  | 51.2   | 169.3  |
|          | Asn59   | -88.6  | 130.0  | 169.2  |
|          | Leu102  | -67.5  | 140.1  | 168.4  |
|          | Pro103  | -46.1  | -44.5  | -173.8 |
|          | His104  | -67.2  | -2.6   | -175.6 |
|          | WC1     | Val47  | -67.0  | 80.4   |
| Gly48    |         | 75.7   | 179.2  | 160.5  |
| Gly49    |         | -96.1  | -162.6 | 174.2  |
| Ile50    |         | 41.7   | 41.4   | 174.0  |
| Gln93    |         | -142.9 | 117.3  | 163.8  |
| Thr94    |         | -109.1 | 115.7  | -179.1 |
| Val95    |         | -140.4 | -128.3 | 179.6  |
| Ala96    |         | -79.4  | 72.0   | 172.4  |
| Gly97    |         | 108.6  | 174.3  | -171.4 |
| Met99    |         | -114.0 | 138.3  | 179.7  |
| Tyr101   |         | -119.3 | 112.1  | 170.2  |
| Pro123   |         | -66.4  | -15.4  | -166.0 |
| WC5      | Gln39   | -60.9  | -23.9  | 177.9  |
|          | Asn40   | -151.1 | 164.8  | 178.2  |
|          | Gly41   | -108.5 | 175.6  | -173.9 |
|          | Leu84   | -87.7  | 139.7  | -178.8 |
|          | Val85   | -142.4 | -152.1 | -176.4 |
|          | Ser86   | -78.0  | 55.3   | 172.2  |
|          | Trp115  | -80.7  | 44.8   | 175.2  |

Note: As described in the text, every residue showing interaction of less than 4Å attains a different conformation in their respective complexes with papain.
